# Supplementary material for: In-hive Pesticide Exposome: Assessing risks to migratory honey bees from in-hive pesticide contamination in the Eastern United States
Source: PubMed Central journal article supplement (PMC5024099; doi:10.1038/srep33207), 2016-09-15
Supplement: srep33207-s1.pdf [file srep33207-s1.pdf]

In-hive Pesticide Exposome: Assessing risks to migratory honey bees from in-hive pesticide  
contamination in the Eastern United States

Kirsten S. Traynor<sup>a</sup>, Jeffery S. Pettis<sup>b</sup>, David R. Tarpy<sup>c</sup>, Christopher A. Mullin<sup>d</sup>, James L. Frazier<sup>d</sup>,  
Maryann Frazier<sup>d</sup>, Dennis vanEngelsdorp<sup>a\*</sup>

**Supplemental Information**

## ***Supplemental text***

### **S1. Pesticide results in individual operations**

OP1: Insecticide levels varied significantly during the sampling period (Fig. S4a,  $F_{6,67} = 25.81$ ,  $p < 0.0001$ ) and had a significant peak in May after apple pollination contributing a mean  $HQ_{\text{Insecticide}} = 1,716.2 \pm 124.3$ , while no insecticide residues were detected during pumpkin pollination in August. Varroacide residues occurred throughout the season with no significant differences among sampling periods. Herbicide residues remained consistently low throughout sampling periods. Fungicides varied significantly during the sampling period ( $F_{6,67} = 10.65$ ,  $p < 0.0001$ ), with a significant peak occurring during blueberry pollination ( $HQ_{\text{Fung}} = 86.5 \pm 9.84$ ) compared to all other sampling periods where fungicide contamination remained relatively low ( $HQ_{\text{Fung}} < 4 \pm 11.5$ ).

OP2: Insecticide contamination varied throughout the beekeeping season with a significant peak during citrus pollination (Fig. S4b,  $F_{6,42} = 2.67$ ,  $p < 0.05$ ). Varroacide residues peaked in August, presumably after *Varroa* treatments and remained elevated throughout the rest of the beekeeping season compared to early sampling periods ( $F_{6,42} = 5.68$ ,  $p < 0.0005$ ). Herbicides, though low contributors to the HQ throughout the collection period, varied significantly ( $F_{6,42} = 2.43$ ,  $p < 0.05$ ) with a peak during citrus pollination and November honey production. Fungicide levels remained low throughout the sampling periods ( $F_{6,42} = 5.91$ ,  $p < 0.0005$ ) with small peaks in June and September during cucumber pollination, significantly elevated above fungicide residues during citrus pollination in March and holding times at the end of the beekeeping year.

OP3: All four categories of pesticides varied significantly throughout the sampling period. The exposure risk of insecticides during citrus pollination was great, with residues contributing  $2,204 \pm 203$  to the HQ and significantly elevated above all other sampling times (Fig. S4c,  $F_{5,18} = 15.76$ ,  $p < 0.0001$ ). Varroacides were also significantly elevated in March during citrus pollination ( $F_{5,18} = 18.51$ ,  $p <$

0.0001), presumably because of early spring *Varroa* treatments. As seen in Op2, herbicides (though low contributors to the HQ throughout the collection period) varied significantly ( $F_{5,18} = 8.94$ ,  $p = 0.0002$ ) with a peak during citrus and cranberry pollination. Fungicides ( $F_{6,18} = 22.46$ ,  $p < 0.0001$ ) peaked in June and July during blueberry and cranberry pollination, contributing  $106 \pm 16.5$  and  $182 \pm 16.5$  points respectively to the HQ.

**Supplemental Figures**

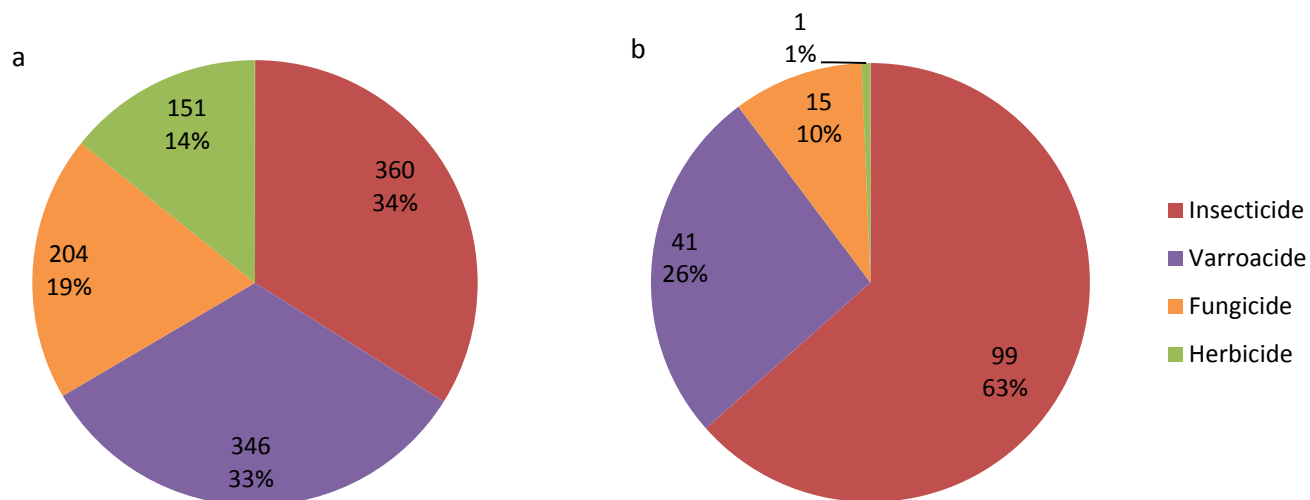

Figure S1. Total residues (a) and relevant residues 50+ (b) detected in bee bread samples, segregated by pesticide category. Insecticides and varroacides each make up a third of all total detects (left), while insecticides make up the majority of the relevant detects. a) Total residue detects = 1,061; b) relevant residue detects = 156. Numerical labels for each pie wedge indicate n (above) and % of total (below).

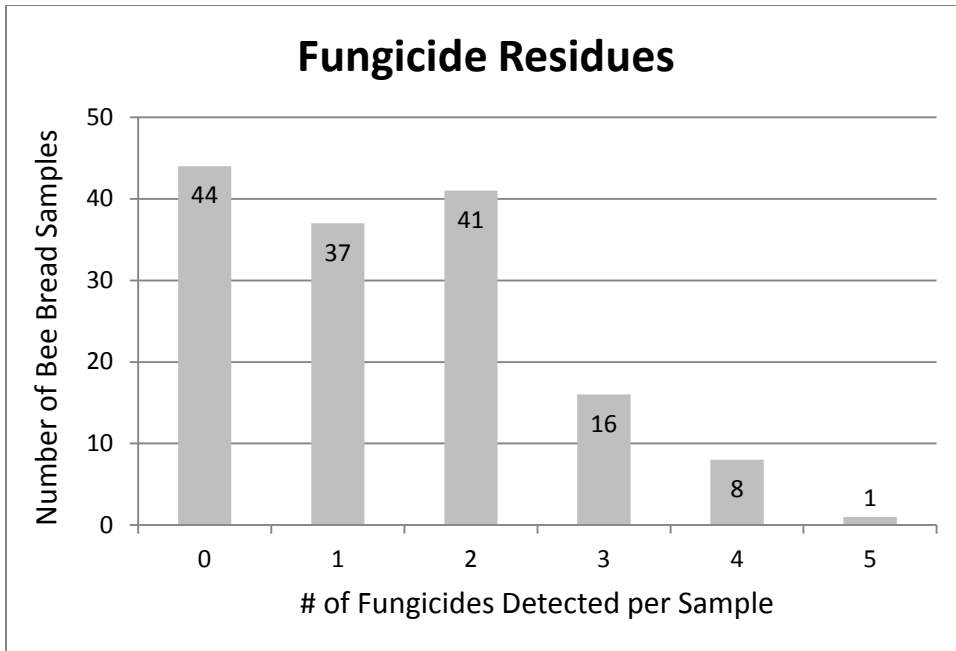

Figure S2. The number of fungicide residues detected per bee bread sample collected over the course of the season.

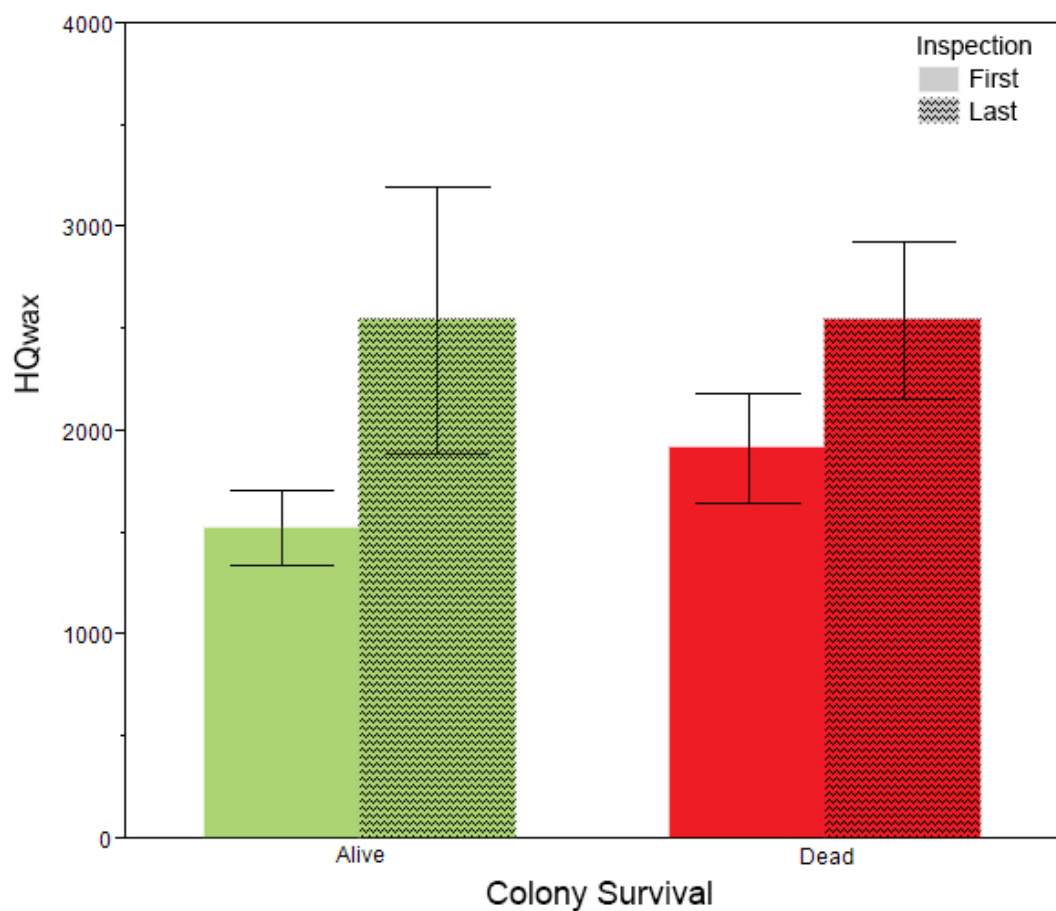

Figure S3. Mean HQ<sub>wax</sub> ( $\pm$  S.E.) for colonies at the first (solid) and last (pattern) inspection periods for colonies that were alive (green) throughout or died (red) during the beekeeping season.

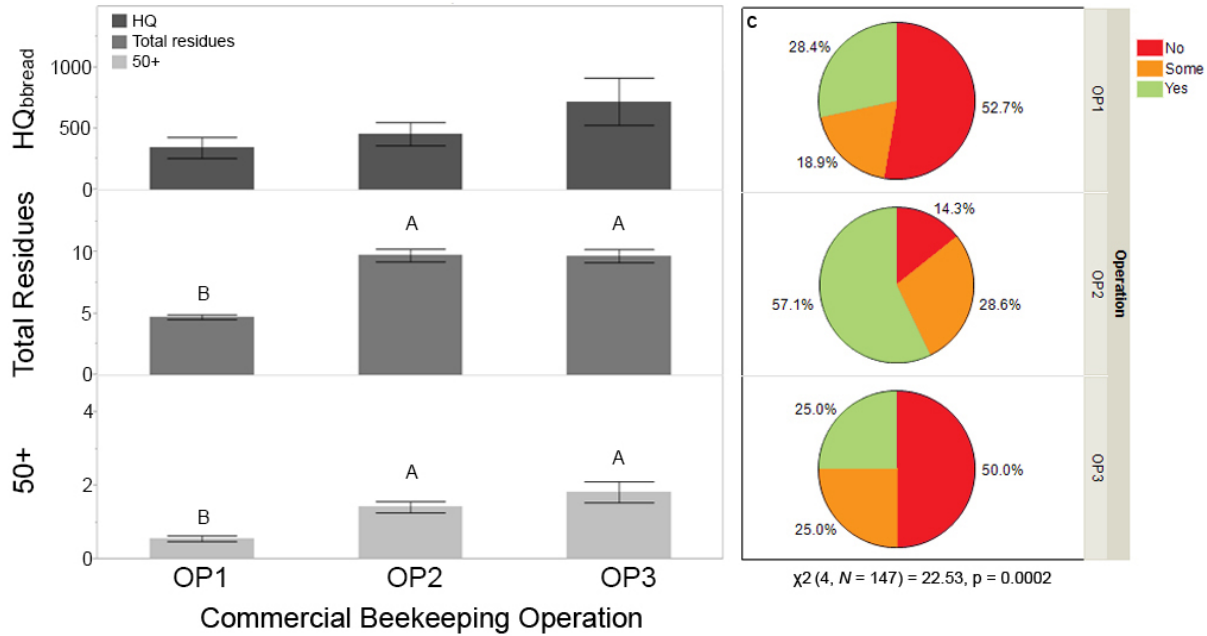

Figure S4. HQ, Pesticide Residues, Relevant Residues (50+) and Colony Survival by Beekeeping Operation. The mean number of pesticide products and the mean number of relevant products contributing 50+ points to the  $HQ_{bbread}$  differed between beekeeping operations. Colony survival throughout the beekeeping season also differed between operations; red = all colonies in sampling pool died; orange = mixed pools, where some colonies in the sampling pool died; green = all colonies in the sampling pool survived through Jan 2008.

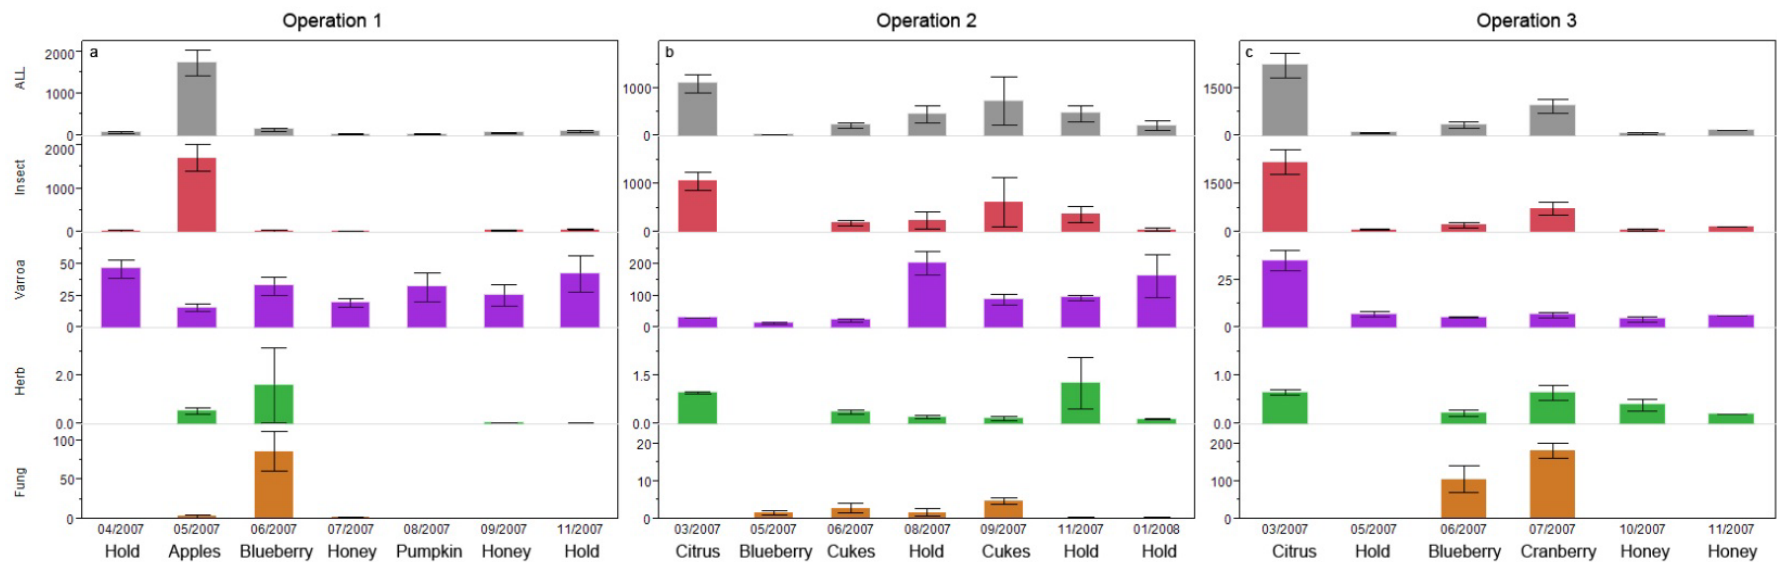

Figure S5. Proportion of HQ score in bee bread samples collected over the season grouped by pesticide categories and segregated by commercial operation. Mean  $HQ_{\text{bread}} (\pm \text{S.E.})$  for all pesticide residues (gray) and divided into the four pesticide categories of insecticides (red), varroacides (purple), herbicides (green) and fungicides (orange) by operation; a = Operation 1, b = Operation 2, c = Operation 3.



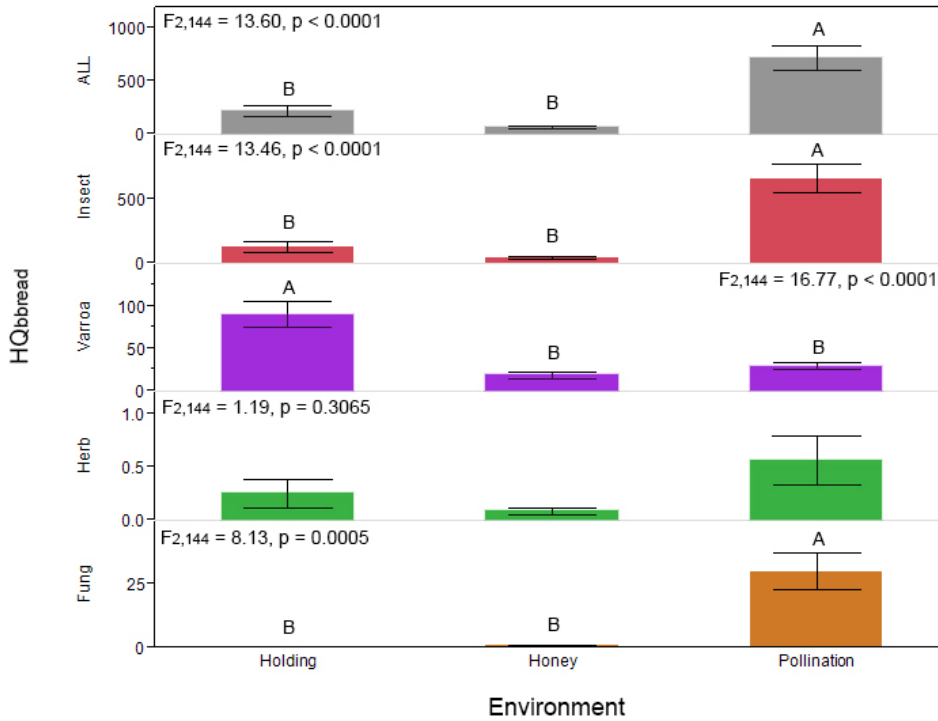

Figure S6. The  $HQ_{bbread}$  of samples collected in different colony environments, total pesticide HQ scores and scores broken down by pesticide classification are presented. Mean  $HQ_{bbread}$  ( $\pm$  S.E.) for all pesticide residues (gray) and divided into the four pesticide categories of insecticides (red), varroacides (purple), herbicides (green) and fungicides (orange) varied by beekeeping environment with the highest  $HQ_{bbread}$  scores during pollination events compared to honey production or holding environments for all components except varroacides. Significant differences indicated by different letters.

## Supplemental Tables

**Table S1.** Pesticide category, mode of action, average LD<sub>50</sub> and toxicity rank.

| Pesticide                                    | Category    | Mode of Action <sup>a</sup> | Average LD <sub>50</sub> (µg/bee) <sup>b</sup> | Toxicity Rank |
|----------------------------------------------|-------------|-----------------------------|------------------------------------------------|---------------|
| 1-Naphthol (Carbaryl degradate)              | Insecticide | 1.AChE                      | 0.442                                          | High          |
| 3-Hydroxycarbofuran (degradate)              | Insecticide | 1.AChE                      | 0.115                                          | High          |
| Aldicarb sulfone                             | Insecticide | 1.AChE                      | 83                                             | Low           |
| Aldicarb sulfoxide                           | Insecticide | 1.AChE                      | 1.84                                           | Moderate      |
| Allethrin                                    | Insecticide | 3.NaCh                      | 6.1                                            | Moderate      |
| Atrazine                                     | Herbicide   | C1.PPII                     | 98.5                                           | Low           |
| Azinphos-methyl                              | Insecticide | 1.AChE                      | 0.179                                          | High          |
| Azoxystrobin                                 | Fungicide   | C.Resp                      | 112                                            | Non-toxic     |
| Bifenthrin                                   | Insecticide | 3.NaCh                      | 0.0412                                         | High          |
| Boscalid                                     | Fungicide   | C.Resp                      | 155                                            | Non-toxic     |
| Captan                                       | Fungicide   | M.Multi                     | 135                                            | Non-toxic     |
| Carbaryl                                     | Insecticide | 1.AChE                      | 0.442                                          | High          |
| Carbendazim (MBC)                            | Fungicide   | B.Cyto                      | 50                                             | Low           |
| Carfentrazone-ethyl                          | Herbicide   | E.PPO                       | 85.4                                           | Low           |
| Chlorfenapyr                                 | Insecticide | UN                          | 0.12                                           | High          |
| Chlorfenvinphos                              | Insecticide | 1.AChE                      | 2.32                                           | Moderate      |
| Chlorferone (Coumaphos degradate)            | Varroacide  | 1.AChE                      | 5.93                                           | Moderate      |
| Chlorothalonil                               | Fungicide   | M.Multi                     | 111                                            | Non-toxic     |
| Chlorpyrifos                                 | Insecticide | 1.AChE                      | 0.0762                                         | High          |
| Coumaphos                                    | Varroacide  | 1.AChE                      | 5.93                                           | Moderate      |
| Coumaphos oxon                               | Varroacide  | 1.AChE                      | 5.93                                           | Moderate      |
| Cyfluthrin                                   | Insecticide | 3.NaCh                      | 0.0279                                         | High          |
| Cyhalothrin                                  | Insecticide | 3.NaCh                      | 0.183                                          | High          |
| Cypermethrin                                 | Insecticide | 3.NaCh                      | 0.188                                          | High          |
| Cyprodinil                                   | Fungicide   | D.AAsyn                     | 332                                            | Non-toxic     |
| DDD (DDT degradate)                          | Insecticide | 3.NaCh                      | 6.4                                            | Moderate      |
| DDE (DDT degradate)                          | Insecticide | 3.NaCh                      | 6.4                                            | Moderate      |
| DDT                                          | Insecticide | 3.NaCh                      | 6.4                                            | Moderate      |
| Deltamethrin                                 | Insecticide | 3.NaCh                      | 0.0434                                         | High          |
| Diazinon                                     | Insecticide | 1.AChE                      | 0.169                                          | High          |
| Dicofol                                      | Insecticide | UN                          | 18.6                                           | Low           |
| Dieldrin                                     | Insecticide | UN                          | 0.227                                          | High          |
| Dimethomorph                                 | Fungicide   | F.LSMI                      | 30.8                                           | Low           |
| Diphenamid                                   | Herbicide   | K3.ICD                      | 2430                                           | Non-toxic     |
| DMA (2,4-Dimethylaniline, Amitraz degradate) | Varroacide  | 19.Octo                     | 75                                             | Low           |
| DMPF (2,4-Dimethylphenyl                     | Varroacide  | 19.Octo                     | 75                                             | Low           |

|                                |             |          |         |           |
|--------------------------------|-------------|----------|---------|-----------|
| formamide, Amitraz degradate)  |             |          |         |           |
| Endosulfan 1                   | Insecticide | 2.GABA   | 7.05    | Moderate  |
| Endosulfan 2                   | Insecticide | 2.GABA   | 7.05    | Moderate  |
| Endosulfan sulfate (degradate) | Insecticide | 2.GABA   | 21.8    | Moderate  |
| Esfenvalerate                  | Insecticide | 3.NaCh   | 0.162   | High      |
| Ethion                         | Insecticide | 1.AChE   | 10.7    | Moderate  |
| Ethofumesate                   | Herbicide   | N.ILS    | 50      | Low       |
| Famoxadone                     | Fungicide   | C.Resp   | 25      | Low       |
| Fenamidone                     | Fungicide   | C.Resp   | 93.6    | Low       |
| Fenbuconazole                  | Fungicide   | G.Sterol | 149     | Non-toxic |
| Fenhexamid                     | Fungicide   | G.Sterol | 159     | Non-toxic |
| Fenoxaprop-P-ethyl             | Herbicide   | A.ACCase | 220     | Non-toxic |
| Fenpropathrin                  | Insecticide | 3.NaCh   | 0.05    | High      |
| Fipronil                       | Insecticide | 2.GABA   | 0.00811 | High      |
| Fluridone                      | Herbicide   | F1.PDS   | 363     | Non-toxic |
| Fluvalinate-tau                | Varroacide  | 3.NaCh   | 4.32    | Moderate  |
| Heptachlor epoxide             | Insecticide | 3.NaCh   | 6.69    | Moderate  |
| Hexachlorobenzene              | Insecticide | 3.NaCh   | 0.468   | High      |
| Imidacloprid                   | Insecticide | 4.nAChR  | 0.0398  | High      |
| Indoxacarb                     | Insecticide | 22.NaV   | 147     | Non-toxic |
| Iprodione                      | Fungicide   | E.Sig    | 91.7    | Low       |
| Malathion                      | Insecticide | 1.AChE   | 0.232   | High      |
| Metalaxyl                      | Fungicide   | A.Nuc    | 113     | Non-toxic |
| Methidathion                   | Insecticide | 1.AChE   | 0.201   | High      |
| Methoxyfenozide                | Insecticide | 18.EcRs  | 100     | Non-toxic |
| Metolachlor                    | Herbicide   | K3.ICD   | 126     | Non-toxic |
| Metribuzin                     | Herbicide   | C1.PPII  | 56.7    | Low       |
| Myclobutanil                   | Fungicide   | G.Sterol | 161     | Non-toxic |
| Norflurazon                    | Herbicide   | F1.PDS   | 163     | Non-toxic |
| Oxyfluorfen                    | Herbicide   | E.PPO    | 100     | Non-toxic |
| Parathion-methyl               | Insecticide | 1.AChE   | 3       | Moderate  |
| Pendimethalin                  | Herbicide   | K3.ICD   | 74.9    | Low       |
| Permethrin                     | Insecticide | 3.NaCh   | 0.115   | High      |
| Phosalone                      | Insecticide | 1.AChE   | 4.4     | Moderate  |
| Piperonyl butoxide             | Insecticide | Syn      | 105     | Non-toxic |
| Potasan                        | Insecticide | 1.AChE   | 5.93    | Moderate  |
| Prallethrin                    | Insecticide | 3.NaCh   | 0.027   | High      |
| Pronamide                      | Herbicide   | K1.MAI   | 158     | Non-toxic |
| Propanil                       | Herbicide   | C2.PPII  | 72.8    | Low       |
| Propiconazole                  | Fungicide   | G.Sterol | 67.5    | Low       |
| Pyraclostrobin                 | Fungicide   | C.Resp   | 86.6    | Low       |
| Pyrethrins                     | Insecticide | 3.NaCh   | 0.211   | High      |
| Pyridaben                      | Insecticide | 21.ET    | 0.024   | High      |
| Pyriproxyfen                   | Insecticide | 7.JH     | 87      | Low       |
| Sethoxydim                     | Herbicide   | A.ACCase | 10      | Moderate  |
| Simazine                       | Herbicide   | C1.PPII  | 96.9    | Low       |

|                         |             |          |      |           |
|-------------------------|-------------|----------|------|-----------|
| Spiromesifen            | Insecticide | 23.ACC   | 200  | Non-toxic |
| Tebufenozide            | Insecticide | 18.EcRs  | 234  | Non-toxic |
| Tebuthiuron             | Herbicide   | C2.PPII  | 65   | Low       |
| Tetradifon              | Insecticide | 1.AChE   | 11   | Moderate  |
| Thiabendazole           | Fungicide   | B.Cyto   | 50   | Low       |
| Thiacloprid             | Insecticide | 4.nAChR  | 25.2 | Low       |
| THPI (Captan degradate) | Fungicide   | M.Multi  | 135  | Non-toxic |
| Triadimefon             | Fungicide   | G.Sterol | 25   | Low       |
| Tribufos or DEF         | Herbicide   | N/A      | 27.1 | Low       |
| Trifloxystrobin         | Fungicide   | C.Resp   | 175  | Non-toxic |
| Trifluralin             | Herbicide   | K1.MAI   | 68.5 | Low       |
| Vinclozolin             | Fungicide   | E.Sig    | 100  | Non-toxic |

<sup>a</sup>Mode of Action (MOA)<sup>1</sup>:

For ***insecticides and varroacides*** source: <http://www.irac-online.org/modes-of-action/>; 1.AChE – Acetylcholinesterase inhibitors; 2.GABA - GABA-gated chloride channel blockers, 3.NaCh – Sodium channel modulators, 4.nAChR -Nicotinic acetylcholine receptor competitive modulators, 7.JH – Juvenile hormone mimics, 18.EcRs - Ecdysone receptor agonists, 19.Octo - Octopamine receptor agonists, 21.ET - Mitochondrial complex I electron transport inhibitors, 22.NaV- Voltage-dependent sodium channel blockers, 23.ACC -Inhibitors of acetyl coa carboxylase, Syn – Synergist without having pesticidal activity on its own, UN- Unknown or uncertain MOA;

For ***fungicides*** source: <http://www.frac.info/docs/default-source/publications/frac-code-list/frac-code-list-2016.pdf?sfvrsn=2>; A.Nuc - Nucleic acids synthesis, B.Cyto - Cytoskeleton and motor proteins; C.Resp – Respiration, D.AAsyn - Amino acids and protein synthesis, E.Sig - Signal transduction, G.Sterol - Sterol biosynthesis in membranes, M.Multi - Multi-site contact activity;

For ***herbicides*** source: <http://www.hracglobal.com/pages/classificationofherbicidesiteofaction.aspx>; A.ACCase - Inhibition of acetyl CoA carboxylase, C1.PPII- Inhibition of photosynthesis at photosystem II (WSSA Group 5), C2.PPII -Inhibition of photosynthesis at photosystem II (WSSA Group 7), E.PPO - Inhibition of protoporphyrinogen oxidase(PPO), F1.PDS - Inhibition of carotenoid biosynthesis at the phytoene desaturase step (PDS), K1.MAI - Microtubule assembly inhibition, K3.ICD- Inhibition of cell division, N.ILS - Inhibition of lipid synthesis, N/A – not applicable

<sup>b</sup>Sources: US-EPA Ecotox Database <http://cfpub.epa.gov/ecotox/>; University of Hertfordshire (2015), The Pesticide Properties DataBase (PPDB) <http://sitem.herts.ac.uk/aeru/ppdb/en/index.htm>; some additional primary literature.

Table S2. Pesticide residues detected on bees (n=38) collected from the brood nest, measured as the number of detects, the pesticide load, and the HQ<sub>bee</sub> score.

| Pesticide                           | Category | Detects | HQ 50+ | %    | High  | Low  | Median | 90%   | 95%    | Mean | SEM  | LOD (ppb) | Max HQ  | Mean HQ | Samples above 1000 HQ |
|-------------------------------------|----------|---------|--------|------|-------|------|--------|-------|--------|------|------|-----------|---------|---------|-----------------------|
| 2,4 Dimethylaniline (DMA)           | Varroa   | 1       | 0      | 2.6  | 275   | 275  | 275    | 275   | 275    |      | 275  | 50        | 3.55    | 3.55    |                       |
| 2,4 Dimethylphenyl formamide (DMPF) | Varroa   | 2       | 0      | 5.3  | 223   | 171  | 197    | 217.8 | 220.4  | 26   | 171  | 4         | 8.92    | 7.88    |                       |
| Carbendazim (MBC)                   | Fung     | 1       | 0      | 2.6  | 14.3  | 14.3 | 14.3   | 14.3  | 14.3   |      | 14.3 | 5         | 0.29    | 0.29    |                       |
| Chlorothalonil                      | Fung     | 1       | 0      | 2.6  | 35.8  | 35.8 | 35.8   | 35.8  | 35.8   |      | 35.8 | 5         | 0.32    | 0.32    |                       |
| Coumaphos                           | Varroa   | 9       | 0      | 23.7 | 11    | 1    | 1.6    | 6.28  | 8.64   | 1.10 | 1    | 1         | 1.85    | 0.49    |                       |
| DDE p,p'                            | Insect   | 1       | 0      | 2.6  | 6.6   | 6.6  | 6.6    | 6.6   | 6.6    |      | 6.6  | 2         | 1.03    | 1.03    |                       |
| Dicofol                             | Insect   | 1       | 0      | 2.6  | 3.8   | 3.8  | 3.8    | 3.8   | 3.8    |      | 3.8  | 1         | 0.20    | 0.20    |                       |
| Fenoxaprop-ethyl                    | Herb     | 1       | 0      | 2.6  | 15.4  | 15.4 | 15.4   | 15.4  | 15.4   |      | 15.4 | 6         | 0.07    | 0.07    |                       |
| Fipronil                            | Insect   | 1       | 1      | 2.6  | 9.9   | 9.9  | 9.9    | 9.9   | 9.9    |      | 9.9  | 10        | 1220.7+ | 1220.7+ | 1                     |
| Fluvalinate                         | Varroa   | 31      | 0      | 81.6 | 172.6 | 1.1  | 9.2    | 91.9  | 129.95 | 8.42 | 1.1  | 1         | 39.95   | 9.07    |                       |
| Methoxyfenozide                     | Insect   | 1       | 0      | 2.6  | 1.5   | 1.5  | 1.5    | 1.5   | 1.5    |      | 1.5  | 2         | 0.02    | 0.02    |                       |
| Pendimethalin                       | Herb     | 2       | 0      | 5.3  | 27.6  | 25.1 | 26.35  | 27.35 | 27.48  | 1.25 | 25.1 | 6         | 0.37    | 0.35    |                       |
| Pronamide                           | Herb     | 1       | 0      | 2.6  | 2.2   | 2.2  | 2.2    | 2.2   | 2.2    |      | 2.2  | 1         | 0.01    | 0.01    |                       |

HQ scores marked with + exceed 1,000 HQ, indicating that bees are at potential risk from these pesticides, as exposure is above 10% of their LD<sub>50</sub>. Category of detected pesticides, number of detections, number of relevant detections (HQ 50+), pesticide prevalence (%), range of pesticide loads (high & low), median, 90th and 95th percentile of pesticide load (in ppb), mean, standard error of the mean (SEM), maximum HQ detected, mean HQ detected, and the number of samples contributing 1,000+ points to the HQ score.

Table S3. Pesticide residues detected in pooled bee bread (n=147) collected adjacent to the brood nest, measured as the number of detects, the pesticide load, and the HQ<sub>bee</sub> score.

| Pesticide                           | Category | Detects | HQ 50+ | Crop with Highest Residue | %    | High   | Low  | Median | 90%     | 95%     | Mean   | SEM   | LOD (ppb) | Max HQ  | Mean HQ | Samples above 1000 HQ |
|-------------------------------------|----------|---------|--------|---------------------------|------|--------|------|--------|---------|---------|--------|-------|-----------|---------|---------|-----------------------|
| 1-Naphthol                          | Insect   | 6       | 2      | Cran                      | 4.1  | 85.5   | 3.6  | 9.1    | 57.2    | 71.4    | 23.3   | 13.0  | 10        | 193.4   | 52.8    |                       |
| 2,4 Dimethylphenyl formamide (DMPF) | Varroa   | 59      | 0      | Holding                   | 40.1 | 1117.0 | 9.1  | 73.2   | 270.6   | 528.6   | 138.3  | 24.5  | 4         | 44.7    | 5.5     |                       |
| Aldicarb sulfone                    | Insect   | 3       | 0      | Orange                    | 2.0  | 97.2   | 43.5 | 59.7   | 89.7    | 93.5    | 66.8   | 15.9  | 2         | 1.2     | 0.8     |                       |
| Aldicarb sulfoxide                  | Insect   | 12      | 11     | Orange                    | 8.2  | 1245.0 | 77.0 | 551.5  | 1031.3  | 1131.7  | 602.4  | 107.9 | 20        | 676.6   | 327.4   |                       |
| Atrazine                            | Herb     | 20      | 0      | Apples                    | 13.6 | 37.3   | 5.4  | 10.7   | 28.3    | 31.8    | 13.5   | 2.1   | 6         | 0.4     | 0.1     |                       |
| Azinphos methyl                     | Insect   | 3       | 2      | Apples                    | 2.0  | 107.0  | 3.9  | 69.6   | 99.5    | 103.3   | 60.2   | 30.1  | 6         | 597.8   | 336.1   |                       |
| Azoxystrobin                        | Fung     | 40      | 0      | Cukes                     | 27.2 | 83.1   | 1.0  | 10.5   | 59.6    | 66.4    | 20.0   | 3.4   | 2         | 0.7     | 0.2     |                       |
| Bifenthrin                          | Insect   | 8       | 7      | Honey                     | 5.4  | 5.9    | 1.4  | 3.0    | 5.8     | 5.8     | 3.5    | 0.5   | 1         | 143.2   | 85.9    |                       |
| Captan                              | Fung     | 16      | 0      | Cukes                     | 10.9 | 832.0  | 25.0 | 78.1   | 442.0   | 550.0   | 169.1  | 55.1  | 10        | 6.2^    | 1.3     |                       |
| Carbaryl                            | Insect   | 19      | 16     | Cran                      | 12.9 | 364.0  | 19.5 | 36.9   | 221.0   | 242.5   | 76.5   | 21.1  | 30        | 823.5   | 173.2   |                       |
| Carbendazim (MBC)                   | Fung     | 5       | 0      | Apples                    | 3.4  | 17.4   | 1.5  | 1.8    | 12.4    | 14.9    | 5.5    | 3.0   | 5         | 0.3     | 0.1     |                       |
| Chlorfenvinphos                     | Insect   | 1       | 0      | Honey                     | 0.7  | 10.7   | 10.7 | 10.7   | 10.7    | 10.7    | 10.7   |       | 6         | 4.6     | 4.6     |                       |
| Chlorothalonil                      | Fung     | 87      | 13     | Cran                      | 59.2 | 26600  | 1.2  | 48.1   | 14564.0 | 18770.0 | 2750.6 | 693.3 | 5         | 239.6^  | 24.8^   |                       |
| Chlorpyrifos                        | Insect   | 50      | 22     | Apples                    | 34.0 | 235.0  | 1.1  | 2.9    | 128.9   | 200.8   | 33.4   | 9.2   | 1         | 3084.0+ | 438.0   | 9                     |
| Coumaphos                           | Varroa   | 133     | 28     | Holding                   | 90.5 | 3260.0 | 1.0  | 10.0   | 531.0   | 806.6   | 174.0  | 36.1  | 1         | 549.7   | 29.3    |                       |
| Coumaphos oxon                      | Varroa   | 4       | 0      | Holding                   | 2.7  | 24.1   | 5.8  | 16.1   | 22.3    | 23.2    | 15.5   | 3.8   | 5         | 4.1     | 2.6     |                       |
| Cyfluthrin                          | Insect   | 11      | 10     | Cukes                     | 7.5  | 7.4    | 1.1  | 4.0    | 7.2     | 7.3     | 4.5    | 0.7   | 4         | 265.2   | 160.6   |                       |
| Cyhalothrin total                   | Insect   | 6       | 0      | Cukes                     | 4.1  | 2.3    | 0.9  | 1.2    | 2.1     | 2.2     | 1.4    | 0.2   | 1         | 12.6    | 7.7     |                       |
| Cypermethrin                        | Insect   | 8       | 0      | Holding                   | 5.4  | 7.7    | 1.6  | 3.8    | 6.9     | 7.3     | 4.2    | 0.7   | 4         | 41.0    | 22.2    |                       |
| DDD p,p'                            | Insect   | 2       | 0      | Cukes                     | 1.4  | 13.4   | 11.8 | 12.6   | 13.2    | 13.3    | 12.6   | 0.8   | 4         | 2.1     | 2.0     |                       |
| DDT p,p'                            | Insect   | 1       | 0      | Honey                     | 0.7  | 35.6   | 35.6 | 35.6   | 35.6    | 35.6    | 35.6   |       | 4         | 5.6     | 5.6     |                       |
| Deltamethrin                        | Insect   | 1       | 1      | Holding                   | 0.7  | 37.5   | 37.5 | 37.5   | 37.5    | 37.5    | 37.5   |       | 20        | 864.1   | 864.1   |                       |
| Diazinon                            | Insect   | 4       | 0      | Cran                      | 2.7  | 4.6    | 2.0  | 2.4    | 4.0     | 4.3     | 2.8    | 0.6   | 1         | 27.2    | 16.7    |                       |
| Dicofol                             | Insect   | 11      | 0      | Holding                   | 7.5  | 88.6   | 4.2  | 16.6   | 53.1    | 70.9    | 27.5   | 7.6   | 1         | 4.8     | 1.5     |                       |
| Diphenamid                          | Fung     | 2       | 0      | Cukes                     | 1.4  | 1.0    | 1.0  | 1.0    | 1.0     | 1.0     | 1.0    | 0.0   | 1         | 0.0     | 0.0     |                       |
| Endosulfan I                        | Insect   | 45      | 0      | Cukes                     | 30.6 | 76.7   | 1.2  | 6.0    | 46.1    | 53.9    | 15.0   | 2.8   | 2         | 10.9    | 2.1     |                       |
| Endosulfan II                       | Insect   | 40      | 0      | Cukes                     | 27.2 | 67.7   | 1.0  | 3.9    | 37.9    | 47.0    | 11.9   | 2.6   | 2         | 9.6     | 1.7     |                       |
| Endosulfan sulfate                  | Insect   | 48      | 0      | Cukes                     | 32.7 | 12.6   | 1.0  | 4.3    | 9.7     | 10.5    | 4.7    | 0.5   | 2         | 0.6     | 0.2     |                       |

| Pesticide        | Category | Detects | HQ 50+ | Crop with Highest Residue | %     | High  | Low   | Median | 90%   | 95%   | Mean  | SEM  | LOD (ppb) | Max HQ  | Mean HQ | Samples above 1000 HQ |
|------------------|----------|---------|--------|---------------------------|-------|-------|-------|--------|-------|-------|-------|------|-----------|---------|---------|-----------------------|
| Esfenvalerate    | Insect   | 14      | 0      | Cukes                     | 9.5   | 5.1   | 1.0   | 3.4    | 4.8   | 5.0   | 3.6   | 0.3  | 2         | 31.5    | 22.4    |                       |
| Famoxadone       | Fung     | 6       | 0      | Cukes                     | 4.1   | 141.0 | 73.5  | 95.7   | 125.5 | 133.3 | 98.3  | 10.9 | 20        | 5.6^    | 3.9     |                       |
| Fenamidone       | Fung     | 1       | 0      | Holding                   | 0.7   | 73.9  | 73.9  | 73.9   | 73.9  | 73.9  | 73.9  |      | 10        | 0.8     | 0.8     |                       |
| Fenhexamid       | Fung     | 6       | 0      | Blue                      | 4.1   | 129.0 | 5.8   | 21.6   | 80.1  | 104.5 | 36.2  | 19.0 | 6         | 0.8     | 0.2     |                       |
| Fenpropathrin    | Insect   | 28      | 27     | Honey                     | 19.0  | 170.0 | 2.0   | 10.5   | 66.2  | 81.9  | 24.6  | 6.9  | 1         | 3400.0+ | 491.2   | 5                     |
| Fipronil         | Insect   | 1       | 1      | Cukes                     | 0.7   | 28.5  | 28.5  | 28.5   | 28.5  | 28.5  | 28.5  |      | 10        | 3514.2+ | 3514.2+ | 1                     |
| Fluridone        | Herb     | 1       | 0      | Holding                   | 0.7   | 5.8   | 5.8   | 5.8    | 5.8   | 5.8   | 5.8   |      | 10        | 0.0     | 0.0     |                       |
| Fluvalinate      | Varroa   | 147     | 8      | Pumpkin                   | 100.0 | 469.0 | 3.6   | 54.1   | 151.3 | 224.1 | 77.3  | 6.6  | 1         | 108.6   | 17.9    |                       |
| Indoxacarb       | Insect   | 7       | 0      | Cukes                     | 4.8   | 113.0 | 10.0  | 84.0   | 108.8 | 110.9 | 79.7  | 13.2 | 3         | 0.8     | 0.5     |                       |
| Methidathion     | Insect   | 2       | 2      | Honey                     | 1.4   | 18.7  | 13.9  | 16.3   | 18.2  | 18.5  | 16.3  | 2.4  | 10        | 93.0    | 81.1    |                       |
| Methoxyfenozide  | Insect   | 20      | 0      | Cukes                     | 13.6  | 128.0 | 0.4   | 25.4   | 100.2 | 120.4 | 41.0  | 9.3  | 2         | 1.3     | 0.4     |                       |
| Metolachlor      | Herb     | 13      | 0      | Apples                    | 8.8   | 31.0  | 6.1   | 10.9   | 23.3  | 27.0  | 13.8  | 2.1  | 6         | 0.2     | 0.1     |                       |
| Metribuzin       | Herb     | 14      | 0      | Cukes                     | 9.5   | 10.6  | 1.2   | 2.6    | 9.5   | 10.1  | 4.2   | 0.9  | 1         | 0.2     | 0.1     |                       |
| Myclobutanil     | Fung     | 1       | 0      | Holding                   | 0.7   | 99.8  | 99.8  | 99.8   | 99.8  | 99.8  | 99.8  |      | 15        | 0.6     | 0.6     |                       |
| Norflurazon      | Herb     | 15      | 0      | Cukes                     | 10.2  | 59.6  | 5.1   | 24.0   | 50.1  | 54.3  | 27.2  | 4.3  | 6         | 0.4     | 0.2     |                       |
| Oxyfluorfen      | Herb     | 1       | 0      | Holding                   | 0.7   | 1.8   | 1.8   | 1.8    | 1.8   | 1.8   | 1.8   |      | 1         | 0.0     | 0.0     |                       |
| Pendimethalin    | Herb     | 67      | 0      | Apples                    | 45.6  | 143.0 | 1.1   | 5.5    | 65.1  | 74.4  | 18.9  | 3.3  | 6         | 1.9     | 0.3     |                       |
| Permethrin total | Insect   | 1       | 1      | Holding                   | 0.7   | 28.7  | 28.7  | 28.7   | 28.7  | 28.7  | 28.7  |      | 10        | 249.6   | 249.6   |                       |
| Phosalone        | Insect   | 1       | 0      | Honey                     | 0.7   | 31.3  | 31.3  | 31.3   | 31.3  | 31.3  | 31.3  |      | 10        | 7.1     | 7.1     |                       |
| Potasan          | Varroa   | 3       | 0      | Cukes                     | 2.0   | 160.0 | 61.5  | 138.0  | 155.6 | 157.8 | 119.8 | 29.9 | 50        | 27.0    | 20.2    |                       |
| Pronamide        | Herb     | 8       | 0      | Cran                      | 5.4   | 173.0 | 17.7  | 57.0   | 121.1 | 147.1 | 68.9  | 18.7 | 1         | 1.1     | 0.4     |                       |
| Propanil         | Herb     | 2       | 0      | Holding                   | 1.4   | 358.0 | 265.0 | 311.5  | 348.7 | 353.4 | 311.5 | 46.5 | 10        | 4.9     | 4.3     |                       |
| Propiconazole    | Fung     | 10      | 0      | Cran                      | 6.8   | 361.0 | 17.3  | 124.6  | 220.6 | 290.8 | 133.9 | 34.5 | 10        | 5.3^    | 2.0     |                       |
| Pyridaben        | Insect   | 5       | 5      | Honey                     | 3.4   | 26.6  | 10.9  | 19.0   | 25.6  | 26.1  | 18.8  | 3.0  | 1         | 1108.3+ | 785.0   | 2                     |
| Sethoxydim       | Herb     | 1       | 0      | Blue                      | 0.7   | 173.0 | 173.0 | 173.0  | 173.0 | 173.0 | 173.0 |      | 2         | 17.3    | 17.3    |                       |
| Simazine         | Herb     | 2       | 0      | Honey                     | 1.4   | 27.1  | 25.9  | 26.5   | 27.0  | 27.0  | 26.5  | 0.6  | 10        | 0.3     | 0.3     |                       |
| Spiromesifen     | Insect   | 1       | 0      | Honey                     | 0.7   | 10.0  | 10.0  | 10.0   | 10.0  | 10.0  | 10.0  |      | 10        | 0.1     | 0.1     |                       |
| Tebufenozide     | Insect   | 1       | 0      | Cran                      | 0.7   | 58.4  | 58.4  | 58.4   | 58.4  | 58.4  | 58.4  |      | 5         | 0.2     | 0.2     |                       |
| Tebuthiuron      | Herb     | 1       | 0      | Blue                      | 0.7   | 11.3  | 11.3  | 11.3   | 11.3  | 11.3  | 11.3  |      | 2         | 0.2     | 0.2     |                       |
| Thiabendazole    | Fung     | 2       | 0      | Orange                    | 1.4   | 5.6   | 4.0   | 4.8    | 5.4   | 5.5   | 4.8   | 0.8  | 1         | 0.1     | 0.1     |                       |
| THPI             | Fung     | 25      | 0      | Honey                     | 17.0  | 363.0 | 69.0  | 242.0  | 312.0 | 331.6 | 213.9 | 17.2 | 50        | 2.7     | 1.6     |                       |

| Pesticide       | Category | Detects | HQ 50+ | Crop with Highest Residue | %   | High  | Low | Median | 90%   | 95%   | Mean | SEM  | LOD (ppb) | Max HQ | Mean HQ | Samples above 1000 HQ |
|-----------------|----------|---------|--------|---------------------------|-----|-------|-----|--------|-------|-------|------|------|-----------|--------|---------|-----------------------|
| Trifloxystrobin | Fung     | 3       | 0      | Apples                    | 2.0 | 264.0 | 3.6 | 16.8   | 214.6 | 239.3 | 94.8 | 84.7 | 1         | 1.5    | 0.5     |                       |
| Trifluralin     | Herb     | 6       | 0      | Cukes                     | 4.1 | 14.4  | 1.0 | 2.4    | 12.2  | 13.3  | 5.4  | 2.3  | 1         | 0.2    | 0.1     |                       |

HQ<sub>bbread</sub> scores marked with + exceed 1,000 HQ, a 10% safety threshold, indicating that bees will consume more than 10% of their LD<sub>50</sub> during the nursing phase of adult life if they feed on this pollen exclusively. Fungicide HQ scores marked with ^ exceed 5 HQ, a level linked with increased colony mortality in commercial beekeeping operations. Category of detected pesticides, number of detections, number of relevant detections (HQ 50+), crop in which the highest residue was detected (Blue = blueberry; Cran = cranberry, Cukes = cucumbers; Holding = holding yards; Honey = honey production), pesticide prevalence (%), range of pesticide loads (high & low), median, 90th and 95th percentile of pesticide load (in ppb), mean, standard error of the mean (SEM), maximum HQ detected, mean HQ detected, and the number of samples contributing 1,000+ points to the HQ score.



Table S4. Pesticide residues detected in wax (n = 108) collected from the brood nest, measured as the number of detects, the pesticide load, and the HQ<sub>wax</sub> score.

| Pesticide                           | Category | Detects | HQ 50+ | %     | High  | Low   | Median | 90%    | 95%     | Mean   | SEM   | LOD (ppb) | Max HQ   | Mean HQ | Samples above 1000 HQ |
|-------------------------------------|----------|---------|--------|-------|-------|-------|--------|--------|---------|--------|-------|-----------|----------|---------|-----------------------|
| 2,4 Dimethylaniline (DMA)           | Varroa   | 59      | 0      | 54.1  | 3820  | 120.0 | 443.0  | 1668.0 | 2466.0  | 751.1  | 106.2 | 50        | 49.3     | 9.7     |                       |
| 2,4 Dimethylphenyl formamide (DMPF) | Varroa   | 91      | 24     | 83.5  | 43000 | 9.2   | 304.0  | 4910.0 | 11320.0 | 2411.2 | 667.7 | 4         | 1720.0 + | 96.4    | 3                     |
| 3-Hydroxycarbofuran                 | Insect   | 2       | 3      | 1.8   | 21.1  | 12.4  | 16.8   | 20.2   | 20.7    | 16.8   | 4.4   | 4         | 183.5    | 145.7   |                       |
| Aldicarb sulfone                    | Insect   | 15      | 0      | 13.8  | 49.6  | 18.0  | 27.5   | 45.8   | 48.1    | 31.0   | 2.8   | 2         | 0.6      | 0.4     |                       |
| Aldicarb sulfoxide                  | Insect   | 22      | 16     | 20.2  | 649   | 13.4  | 298.5  | 609.2  | 638.8   | 306.6  | 48.0  | 20        | 352.7    | 166.6   |                       |
| Allethrin                           | Insect   | 1       | 0      | 0.9   | 1.7   | 1.7   | 1.7    | 1.7    | 1.7     | 1.7    |       | 10        | 0.3      | 0.3     |                       |
| Atrazine                            | Herb     | 27      | 0      | 24.8  | 19.3  | 1.0   | 5.4    | 15.6   | 16.8    | 7.4    | 1.0   | 6         | 0.2      | 0.1     |                       |
| Azoxystrobin                        | Fung     | 23      | 0      | 21.1  | 22.2  | 1.1   | 5.1    | 8.1    | 8.7     | 5.8    | 0.9   | 2         | 0.2      | 0.1     |                       |
| Bifenthrin                          | Insect   | 17      | 12     | 15.6  | 14    | 1.6   | 5.1    | 12.2   | 13.2    | 5.5    | 1.0   | 1         | 339.8    | 133.5   |                       |
| Boscalid                            | Fung     | 1       | 0      | 0.9   | 49    | 49.0  | 49.0   | 49.0   | 49.0    | 49.0   |       | 4         | 0.3      | 0.3     |                       |
| Carbaryl                            | Insect   | 1       | 0      | 0.9   | 4.5   | 4.5   | 4.5    | 4.5    | 4.5     | 4.5    |       | 30        | 10.2     | 10.2    |                       |
| Carbendazim (MBC)                   | Fung     | 9       | 0      | 8.3   | 32.6  | 5.1   | 14.2   | 28.0   | 30.3    | 15.4   | 3.1   | 5         | 0.7      | 0.3     |                       |
| Carfentrazone ethyl                 | Herb     | 1       | 0      | 0.9   | 4.9   | 4.9   | 4.9    | 4.9    | 4.9     | 4.9    |       | 1         | 0.1      | 0.1     |                       |
| Chlorfenopyr                        | Insect   | 1       | 0      | 0.9   | 3.6   | 3.6   | 3.6    | 3.6    | 3.6     | 3.6    |       | 1         | 30.0     | 30.0    |                       |
| Chlorferone                         | Insect   | 4       | 4      | 3.7   | 2830  | 349.0 | 586.0  | 2189.8 | 2509.9  | 507.0  | 585.2 | 50        | 477.2    | 85.5    |                       |
| Chlorothalonil                      | Fung     | 75      | 3      | 68.8  | 53700 | 1.0   | 361.0  | 1772.0 | 3791.0  | 1635.0 | 756.9 | 5         | 483.8 ^  | 14.7 ^  |                       |
| Chlorpyrifos                        | Insect   | 58      | 21     | 53.2  | 68.9  | 1.1   | 2.7    | 14.8   | 25.2    | 6.8    | 1.5   | 1         | 904.2    | 89.8    |                       |
| Coumaphos                           | Varroa   | 109     | 90     | 100.0 | 20500 | 44.9  | 943.0  | 3874.0 | 5690.0  | 1755.7 | 264.9 | 1         | 3457.0 + | 296.1   | 5                     |
| Coumaphos oxon                      | Varroa   | 108     | 2      | 99.1  | 638   | 1.3   | 51.5   | 155.3  | 207.7   | 76.5   | 7.9   | 5         | 107.6    | 12.9    |                       |
| Cyfluthrin                          | Insect   | 4       | 4      | 3.7   | 13.8  | 3.2   | 10.5   | 13.7   | 13.7    | 9.5    | 2.5   | 4         | 494.6    | 340.5   |                       |
| Cyhalothrin total                   | Insect   | 4       | 0      | 3.7   | 7.9   | 2.6   | 5.3    | 7.5    | 7.7     | 5.3    | 1.2   | 1         | 43.2     | 28.8    |                       |
| Cypermethrin                        | Insect   | 5       | 4      | 4.6   | 17.8  | 4.5   | 11.2   | 16.0   | 16.9    | 11.4   | 2.2   | 4         | 94.7     | 60.4    |                       |

| Pesticide               | Category | Detects | HQ 50+ | %     | High  | Low   | Median | 90%    | 95%     | Mean   | SEM   | LOD (ppb) | Max HQ   | Mean HQ  | Samples above 1000 HQ |
|-------------------------|----------|---------|--------|-------|-------|-------|--------|--------|---------|--------|-------|-----------|----------|----------|-----------------------|
| Cyprodinil              | Fung     | 5       | 0      | 4.6   | 106   | 8.7   | 15.1   | 73.2   | 89.6    | 33.2   | 18.4  | 1         | 0.3      | 0.1      |                       |
| DDE p,p'                | Insect   | 1       | 0      | 0.9   | 30.8  | 30.8  | 30.8   | 30.8   | 30.8    | 30.8   |       | 2         | 4.8      | 4.8      |                       |
| Deltamethrin            | Insect   | 7       | 7      | 6.4   | 263   | 107.0 | 124.0  | 224.6  | 243.8   | 152.3  | 21.7  | 20        | 6059.9 + | 3508.9 + | 7                     |
| Diazinon                | Insect   | 1       | 0      | 0.9   | 1.4   | 1.4   | 1.4    | 1.4    | 1.4     | 1.4    |       | 1         | 8.3      | 8.3      |                       |
| Dicofol                 | Insect   | 5       | 0      | 4.6   | 16.2  | 5.7   | 11.1   | 14.7   | 15.5    | 10.2   | 2.0   | 1         | 0.9      | 0.6      |                       |
| Dieldrin                | Insect   | 2       | 1      | 1.8   | 12.1  | 6.9   | 9.5    | 11.6   | 11.8    | 9.5    | 2.6   | 10        | 53.3     | 41.9     |                       |
| Dimethomorph            | Fung     | 1       | 0      | 0.9   | 133   | 133.0 | 133.0  | 133.0  | 133.0   | 133.0  |       | 20        | 4.3      | 4.3      |                       |
| Endosulfan I            | Insect   | 62      | 0      | 56.9  | 16.8  | 1.4   | 4.4    | 10.7   | 12.2    | 5.4    | 0.4   | 2         | 2.4      | 0.8      |                       |
| Endosulfan II           | Insect   | 38      | 0      | 34.9  | 10.8  | 1.2   | 3.7    | 9.0    | 9.8     | 4.6    | 0.4   | 2         | 1.5      | 0.7      |                       |
| Endosulfan sulfate      | Insect   | 11      | 0      | 10.1  | 7.3   | 1.3   | 2.3    | 6.0    | 6.7     | 2.9    | 0.6   | 2         | 0.3      | 0.1      |                       |
| Esfenvalerate           | Insect   | 19      | 8      | 17.4  | 29.1  | 1.0   | 4.5    | 16.8   | 18.2    | 8.8    | 1.7   | 2         | 179.6    | 54.2     |                       |
| Ethion                  | Insect   | 2       | 0      | 1.8   | 131   | 83.6  | 107.3  | 126.3  | 128.6   | 107.3  | 23.7  | 10        | 12.2     | 10.0     |                       |
| Ethofumesate            | Herb     | 2       | 0      | 1.8   | 560   | 224.0 | 392.0  | 526.4  | 543.2   | 392.0  | 168.0 | 5         | 11.2     | 7.8      |                       |
| Fenbuconazole           | Fung     | 8       | 0      | 7.3   | 75.2  | 7.4   | 39.6   | 58.7   | 66.9    | 37.7   | 7.7   | 10        | 0.5      | 0.3      |                       |
| Fenpropathrin           | Insect   | 36      | 35     | 33.0  | 74.5  | 2.3   | 16.8   | 50.7   | 58.3    | 23.1   | 3.3   | 1         | 1490.0 + | 461.1    | 4                     |
| Fipronil                | Insect   | 1       | 1      | 0.9   | 35.9  | 35.9  | 35.9   | 35.9   | 35.9    | 35.9   |       | 10        | 4426.6 + | 4426.6 + | 1                     |
| Fluvalinate             | Varroa   | 109     | 107    | 100.0 | 28700 | 148.0 | 4310.0 | 9580.0 | 11300.0 | 4895.3 | 401.6 | 1         | 6643.5 + | 1133.2 + | 53                    |
| Heptachlor epoxide      | Insect   | 1       | 0      | 0.9   | 13.3  | 13.3  | 13.3   | 13.3   | 13.3    | 13.3   |       | 10        | 2.0      | 2.0      |                       |
| Hexachlorobenzene (HCB) | Fung     | 1       | 0      | 0.9   | 1     | 1.0   | 1.0    | 1.0    | 1.0     | 1.0    |       | 1         | 2.1      | 2.1      |                       |
| Imidacloprid            | Insect   | 2       | 2      | 1.8   | 13.6  | 2.4   | 8.0    | 12.5   | 13.0    | 8.0    | 5.6   | 1         | 341.7    | 201.0    |                       |
| Iprodione               | Fung     | 1       | 0      | 0.9   | 169   | 169.0 | 169.0  | 169.0  | 169.0   | 169.0  |       | 20        | 1.8      | 1.8      |                       |
| Malathion               | Insect   | 1       | 1      | 0.9   | 35.1  | 35.1  | 35.1   | 35.1   | 35.1    | 35.1   |       | 4         | 151.3    | 151.3    |                       |
| Metalaxyl               | Fung     | 1       | 0      | 0.9   | 1.4   | 1.4   | 1.4    | 1.4    | 1.4     | 1.4    |       | 2         | 0.0      | 0.0      |                       |
| Methodathion            | Insect   | 6       | 1      | 5.5   | 11.8  | 2.9   | 5.9    | 10.9   | 11.4    | 6.8    | 1.4   | 10        | 58.7     | 33.8     |                       |
| Methoxyfenozide         | Insect   | 33      | 0      | 30.3  | 495   | 3.5   | 42.3   | 183.0  | 332.6   | 88.6   | 20.1  | 2         | 5.0      | 0.9      |                       |
| Metribuzin              | Herb     | 1       | 0      | 0.9   | 8     | 8.0   | 8.0    | 8.0    | 8.0     | 8.0    |       | 1         | 0.1      | 0.1      |                       |

| Pesticide          | Category | Detects | HQ 50+ | %    | High | Low   | Median | 90%   | 95%   | Mean  | SEM   | LOD (ppb) | Max HQ   | Mean HQ  | Samples above 1000 HQ |
|--------------------|----------|---------|--------|------|------|-------|--------|-------|-------|-------|-------|-----------|----------|----------|-----------------------|
| Norflurazon        | Herb     | 9       | 0      | 8.3  | 5.1  | 1.1   | 2.7    | 3.7   | 4.4   | 2.6   | 0.4   | 6         | 0.0      | 0.0      |                       |
| Oxyfluorfen        | Herb     | 8       | 0      | 7.3  | 27.4 | 2.7   | 6.1    | 16.1  | 21.8  | 8.6   | 2.9   | 1         | 0.3      | 0.1      |                       |
| Parathion methyl   | Insect   | 1       | 0      | 0.9  | 4    | 4.0   | 4.0    | 4.0   | 4.0   | 4.0   |       | 2         | 1.3      | 1.3      |                       |
| Pendimethalin      | Herb     | 32      | 0      | 29.4 | 60   | 2.5   | 5.3    | 10.2  | 11.1  | 7.4   | 1.7   | 6         | 0.8      | 0.1      |                       |
| Permethrin total   | Insect   | 2       | 2      | 1.8  | 276  | 31.0  | 153.5  | 251.5 | 263.8 | 153.5 | 122.5 | 10        | 2400.0 + | 1334.8 + | 1                     |
| Piperonyl butoxide | Insect   | 1       | 0      | 0.9  | 208  | 208.0 | 208.0  | 208.0 | 208.0 | 208.0 |       | 6         | 2.0      | 2.0      |                       |
| Prallethrin        | Insect   | 2       | 2      | 1.8  | 6.8  | 4.3   | 5.6    | 6.6   | 6.7   | 5.6   | 1.3   | 4         | 251.9    | 205.6    |                       |
| Pronamide          | Herb     | 9       | 0      | 8.3  | 22.8 | 1.7   | 2.5    | 13.6  | 18.2  | 6.1   | 2.3   | 1         | 0.1      | 0.0      |                       |
| Propiconazole      | Fung     | 1       | 0      | 0.9  | 166  | 166.0 | 166.0  | 166.0 | 166.0 | 166.0 |       | 10        | 2.5      | 2.5      |                       |
| Pyraclostrobin     | Fung     | 5       | 0      | 4.6  | 13.8 | 1.8   | 11.3   | 13.8  | 13.8  | 9.5   | 2.3   | 2         | 0.2      | 0.1      |                       |
| Pyrethrins         | Insect   | 8       | 8      | 7.3  | 154  | 19.0  | 60.2   | 144.9 | 149.5 | 71.5  | 18.8  | 50        | 729.9    | 338.7    |                       |
| Pyridaben          | Insect   | 1       | 1      | 0.9  | 5.4  | 5.4   | 5.4    | 5.4   | 5.4   | 5.4   |       | 1         | 225.0    | 225.0    |                       |
| Pyriproxyfen       | Insect   | 2       | 0      | 1.8  | 7.6  | 2.2   | 4.9    | 7.1   | 7.3   | 4.9   | 2.7   | 1         | 0.1      | 0.1      |                       |
| Tebufenozide       | Insect   | 10      | 0      | 9.2  | 27.7 | 2.0   | 5.3    | 18.3  | 23.0  | 8.0   | 2.6   | 5         | 0.1      | 0.0      |                       |
| Tetradifon         | Varroa   | 1       | 0      | 0.9  | 4.7  | 4.7   | 4.7    | 4.7   | 4.7   | 4.7   |       | 1         | 0.4      | 0.4      |                       |
| Thiabendazole      | Fung     | 1       | 0      | 0.9  | 7.4  | 7.4   | 7.4    | 7.4   | 7.4   | 7.4   |       | 1         | 0.1      | 0.1      |                       |
| Thiacloprid        | Insect   | 4       | 0      | 3.7  | 7.8  | 1.9   | 5.9    | 7.5   | 7.7   | 5.4   | 1.3   | 1         | 0.3      | 0.2      |                       |
| Triadimefon        | Fung     | 1       | 0      | 0.9  | 2.4  | 2.4   | 2.4    | 2.4   | 2.4   | 2.4   |       | 2         | 0.1      | 0.1      |                       |
| Tribufos (DEF)     | Insect   | 1       | 0      | 0.9  | 7.6  | 7.6   | 7.6    | 7.6   | 7.6   | 7.6   |       | 2         | 0.3      | 0.3      |                       |
| Trifloxystrobin    | Fung     | 2       | 0      | 1.8  | 22.4 | 3.1   | 12.8   | 20.5  | 21.4  | 12.8  | 9.7   | 1         | 0.1      | 0.1      |                       |
| Trifluralin        | Herb     | 12      | 0      | 11.0 | 1.5  | 1.0   | 1.3    | 1.4   | 1.4   | 1.3   | 0.0   | 1         | 0.0      | 0.0      |                       |
| Vinclozolin        | Fung     | 1       | 0      | 0.9  | 2    | 2.0   | 2.0    | 2.0   | 2.0   | 2.0   |       | 1         | 0.0      | 0.0      |                       |

HQ scores marked with + exceed 1,000 HQ, a 10% safety threshold, indicating that bees will contact more than 10% of their LD<sub>50</sub> during the nursing phase of adult life. Fungicide HQ scores marked with ^ exceed 5 HQ, a level linked with increased colony mortality in commercial beekeeping operations. . Category = category of detected pesticides, number of detections, number of relevant detections (HQ 50+), pesticide prevalence (%), range of pesticide loads (high & low), median, 90th and 95th percentile of pesticide load (in ppb), mean, standard error of the mean (SEM), maximum HQ detected, mean HQ detected, and the number of samples contributing 1,000+ points to the HQ score.

Table S5  
Residues detected at 100+ ppb in bee bread

| <b>Catogory</b>          | <b>Name</b>        | <b>N</b>   |
|--------------------------|--------------------|------------|
| Fungicide                | Captan             | 7          |
| Fungicide                | Chlorothalonil     | 35         |
| Fungicide                | Dimethomorph       | 1          |
| Fungicide                | Famoxadone         | 3          |
| Fungicide                | Fenhexamid         | 1          |
| Fungicide                | Iprodione          | 1          |
| Fungicide                | Propiconazole      | 6          |
| Fungicide                | THPI               | 22         |
| Fungicide                | Trifloxystrobin    | 1          |
| <b>Fungicide TOTAL</b>   |                    | <b>77</b>  |
| Varroacide               | DMPF               | 23         |
| Varroacide               | Coumaphos          | 30         |
| Varroacide               | Fluvalinate        | 39         |
| <b>Varroicide TOTAL</b>  |                    | <b>92</b>  |
| Insecticide              | Aldicarb sulfoxide | 11         |
| Insecticide              | Azinphos methyl    | 1          |
| Insecticide              | Carbaryl           | 3          |
| Insecticide              | Chlorpyrifos       | 8          |
| Insecticide              | Fenpropathrin      | 1          |
| Insecticide              | Methoxyfenozone    | 2          |
| Insecticide              | Potasan            | 2          |
| <b>Insecticide TOTAL</b> |                    | <b>28</b>  |
| Herbicide                | Pendimethalin      | 1          |
| Herbicide                | Pronamide          | 1          |
| Herbicide                | Propanil           | 2          |
| Herbicide                | Sethoxydim         | 1          |
| <b>Herbicide TOTAL</b>   |                    | <b>5</b>   |
| <b>Grand TOTAL</b>       |                    | <b>202</b> |

- 1 Johnson, R. M., Ellis, M. D., Mullin, C. A. & Frazier, M. Pesticides and honey bee toxicity - USA. *Apidologie* **41**, 312-331, doi:10.1051/apido/2010018 (2010).
